# Supplementary material for: Accuracy of abdominal ultrasound for the diagnosis of pneumoperitoneum in patients with acute abdominal pain: a pilot study
Source: PubMed Central journal article supplement (PMC4595408; doi:10.1186/s13089-015-0032-6), 2015-10-06
Supplement: 13089_2015_32_MOESM3_ESM.pdf [file 13089_2015_32_MOESM3_ESM.pdf]

|                       |  |
|-----------------------|--|
| <i>Reviewer name</i>  |  |
|                       |  |
| <i>Patient number</i> |  |

### CONVEX Probe

| Abdominal scan                                                                                     | Pneumoperitoneum<br>US sign present* | Pneumoperitoneum<br>US sign absent |
|----------------------------------------------------------------------------------------------------|--------------------------------------|------------------------------------|
| EPIGASTRIUM                                                                                        |                                      |                                    |
| RIGHT<br>HYPOCHONDRIUM                                                                             |                                      |                                    |
| LEFT<br>HYPOCHONDRIUM                                                                              |                                      |                                    |
| RIGHT<br>HYPOCHONDRIUM ON<br>THE LEFT FLANK                                                        |                                      |                                    |
| UMBELICAL                                                                                          |                                      |                                    |
| Comments                                                                                           |                                      |                                    |
| * Enhancement of peritoneal stripe plus ring down artifact or comet tails starting from peritoneum |                                      |                                    |

### LINEAR Probe

| Adominal scan                                                                                      | Pneumoperitoneum<br>US sign present* | Pneumoperitoneum<br>US sign absent |
|----------------------------------------------------------------------------------------------------|--------------------------------------|------------------------------------|
| EPIGASTRIUM                                                                                        |                                      |                                    |
| RIGHT<br>HYPOCHONDRIUM                                                                             |                                      |                                    |
| LEFT<br>HYPOCHONDRIUM                                                                              |                                      |                                    |
| UMBELICAL                                                                                          |                                      |                                    |
| RIGHT<br>HYPOCHONDRIUM ON<br>THE LEFT FLANK                                                        |                                      |                                    |
| Comments                                                                                           |                                      |                                    |
| * Enhancement of peritoneal stripe plus ring down artifact or comet tails starting from peritoneum |                                      |                                    |
